# Supplementary material
Source: Springer Nature journal article supplement (https://www.springermedizin.de/resource/supplementary/12876_2014_1205_MOESM2_ESM.pdf/9438340)

per 1000

g/dl

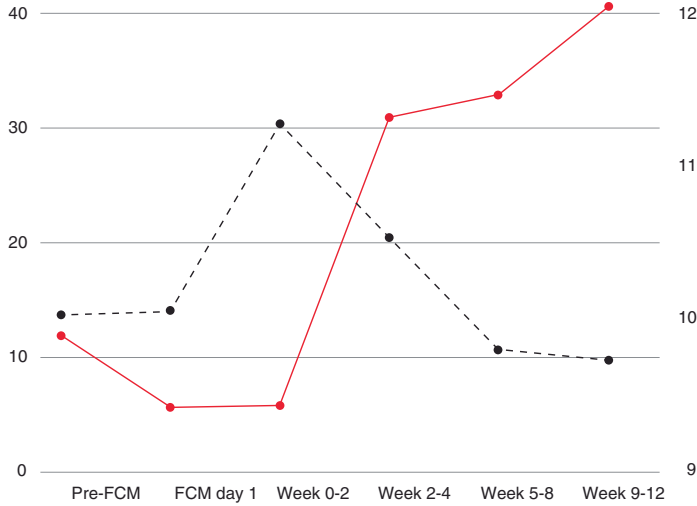

----- Reticulocytes

— Hemoglobin

Supplement: MOESM2 [file 9438340]
